# The American Journal of Psychotherapy

APA's journal of psychotherapy practice and research

Since 1947, the *American Journal of Psychotherapy* has provided a forum for advancing the theory, science, and clinical practice of psychotherapy, publishing articles that expand understanding of psychotherapies, especially in the domains of efficacy, process, education, and practice. The journal provides authors and readers the opportunity to engage fully in pressing psychotherapy issues such as defining core elements of psychotherapies, dissemination of evidence-based practices, scaling best practices for expansion to larger populations, understanding mechanisms of change, and evaluating best practices for psychotherapy training and supervision. From its new home as part of APA Publishing's portfolio of journals, the *American Journal of Psychotherapy* is the ideal vehicle to disseminate knowledge about psychotherapy and send a message that psychotherapy remains firmly within the purview of psychiatry.

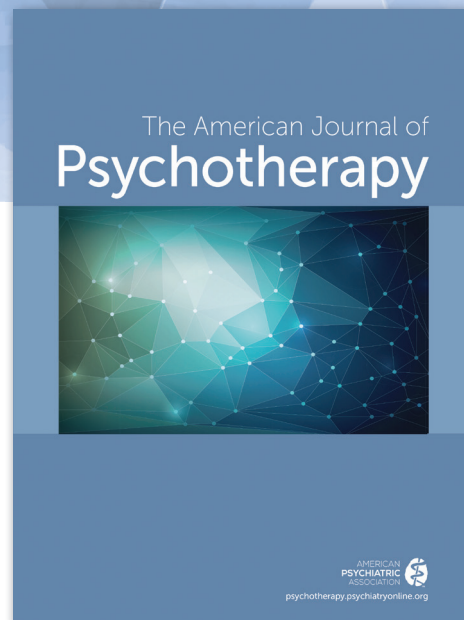

Holly A. Swartz, M.D., Editor-in-Chief

Frequency: Quarterly

Online ISSN: 2575-6559

[psychotherapy.psychiatryonline.org](http://psychotherapy.psychiatryonline.org)

- To receive updates on new content, follow the journal on Twitter (@APAPubJournals) and sign up for free publication alerts at [psychiatryonline.org](http://psychiatryonline.org)
- To see more from the journal, including its entire 70+-year archive or to get information about submitting a paper, visit [www.psychotherapy.psychiatryonline.org](http://www.psychotherapy.psychiatryonline.org)

Check out the most discussed and downloaded papers of those recently published:

- Should Psychotherapy Become a Subspecialty of Psychiatry?
- The Role of Psychotherapy During the COVID-19 Pandemic
- Mass Shootings and Psychotherapy
- Racism: A Challenge for the Therapeutic Dyad

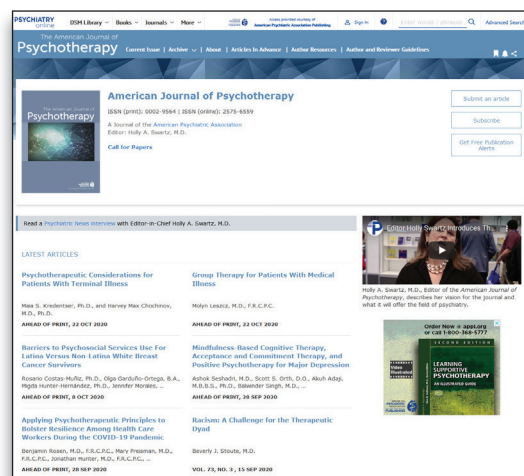

AMERICAN  
PSYCHIATRIC  
ASSOCIATION  
PUBLISHING

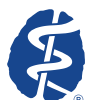

appi.org  
1-800-368-5777  
appi@psych.org

Subscribe Now! Visit [appi.org](http://appi.org) for pricing and more information!

[psychotherapy.psychiatryonline.org](http://psychotherapy.psychiatryonline.org)

AH2041A

Searching for  
the perfect  
psychiatric  
career?

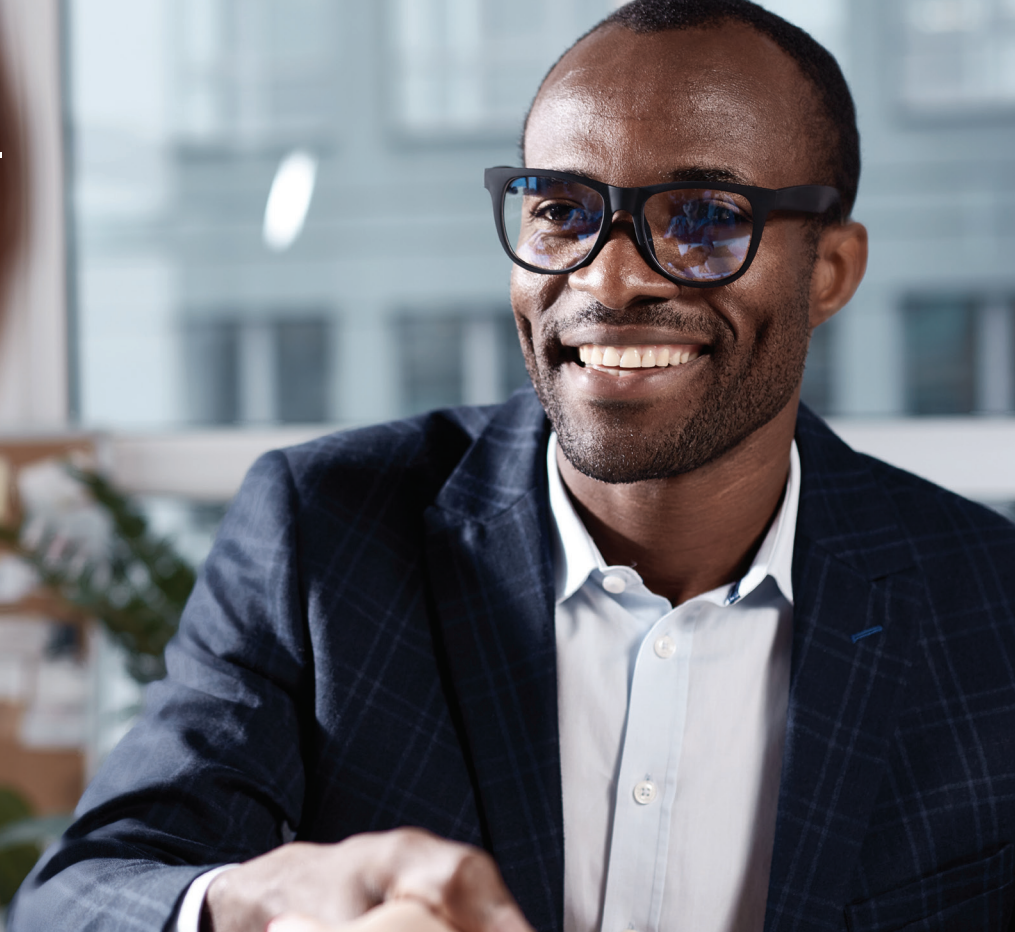

## Let APA JobCentral help!

### Manage Your Career

- Browse hundreds of active job listings!
- Create an account to save jobs, store multiple resumes and cover letters and communicate with employers through our internal messaging system.
- Set up multiple job alerts specifying your skills, interests and location to receive e-mails when employers post jobs that match your criteria.

### Recruit for Open Positions

- Post your job in front of thousands of highly qualified psychiatrists.
- Cross promote your job listing in Psychiatric News.
- Search the anonymous resume database to find your ideal candidate.

AMERICAN  
PSYCHIATRIC  
ASSOCIATION

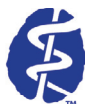

**JOBCENTRAL**  
The Career Hub for Psychiatry

[jobs.psychiatry.org](https://jobs.psychiatry.org)

# Focus

The Journal of Lifelong Learning in Psychiatry

## The Best Resource for

- Clinical Synthesis
- Expert Guidance
- Lifelong Learning
- Maintenance of Certification

**Focus**, APA's quarterly clinical review journal, is designed for practicing psychiatrists to keep abreast of significant clinical knowledge and advances in the field through self-directed lifelong learning. Four issues each year provide comprehensive reviews of major clinical areas of psychiatry. **Focus** also provides an organized learning and self-assessment program with 44 hours of CME each year.

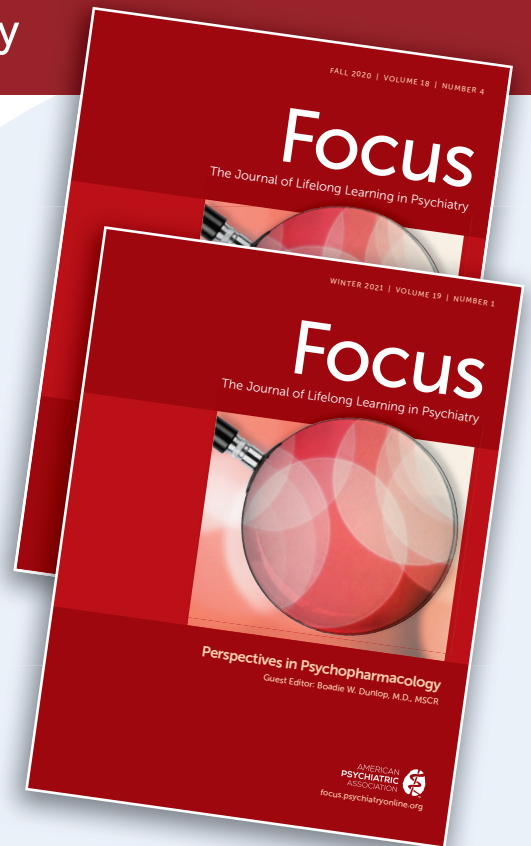

## An Annual Subscription to Focus Gives You:

- Reviews of core areas in psychiatry, with each issue overseen by a Guest Editor clinical expert in that area.
- Articles on best practices, new developments and the current state of practice.
- Quizzes that allow you to earn up to five *AMA PRA Category 1 Credits*™ by completing CME questions for each issue—for a total of up to 20 CME credits per year.
- An annual 120-question **self-assessment exam** for an additional 24 CME credits and APBN MOC self-assessment credits that provides you with a comparison of your result against the group score of your peers.
- Online access to back issues (CME credits for issue quizzes available only for your subscription year).

[focus.psychiatryonline.org](http://focus.psychiatryonline.org)

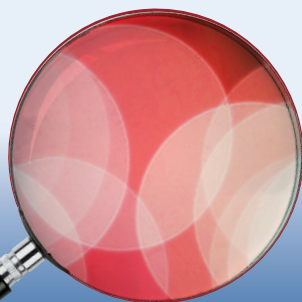

AMERICAN  
PSYCHIATRIC  
ASSOCIATION  
PUBLISHING

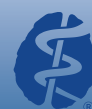

[www.appi.org](http://www.appi.org)  
1-800-368-5777  
[appi@psych.org](mailto:appi@psych.org)

Priority Code AH2126A
