# Dulcan's Textbook of Child and Adolescent Psychiatry, Third Edition

Coming October 2021!

Edited by Mina K. Dulcan, M.D.

Already a foundational resource in the field, *Dulcan's Textbook of Child and Adolescent Psychiatry* has been updated in the third edition, including the latest research and clinical advances. An expanded chapter on telehealth acknowledges the changes and challenges posed by the COVID-19 pandemic and also discusses e-mental health options that support primary care providers, who are often the front line in mental health treatment. Two completely new chapters on pediatric consultation liaison psychiatry examine the history, clinical practice models, scope of interventions, and pharmacological considerations that are relevant to treatment of medically ill children and those seen in primary care—more important than ever, with the significant increase in the number of children with mental health care needs who are seen by pediatricians.

In addition, readers will find thorough, DSM-5-aligned insight from dozens of experts on:

- Neurodevelopmental and other psychiatric disorders, including disorders affecting somatic function, with clinical descriptions, epidemiology, risk factors, diagnosis, treatment options, and more
- A full range of psychosocial treatments, including those focused on both individuals and families, as well as therapeutic milieus and systemic models of care
- The principles and application of psychopharmacology, from antidepressants to antipsychotic medications to mood stabilizers and medications for ADHD
- Specialized issues, including cultural and religious considerations, gender and sexual diversity, and legal and ethical issues

Each chapter features summary points for ease of reference and extensive references for continued study.

Working with young patients, who are changing and evolving with age throughout the course of treatment, and their families presents very real and distinct challenges. This latest edition of *Dulcan's Textbook of Child and Adolescent Psychiatry* provides child and adolescent psychiatrists, pediatricians, family physicians, general psychiatrists, child neurologists, psychologists, advanced practice nurses, psychiatric social workers, and other practitioners the depth and breadth of knowledge needed to treat children and adolescents effectively.

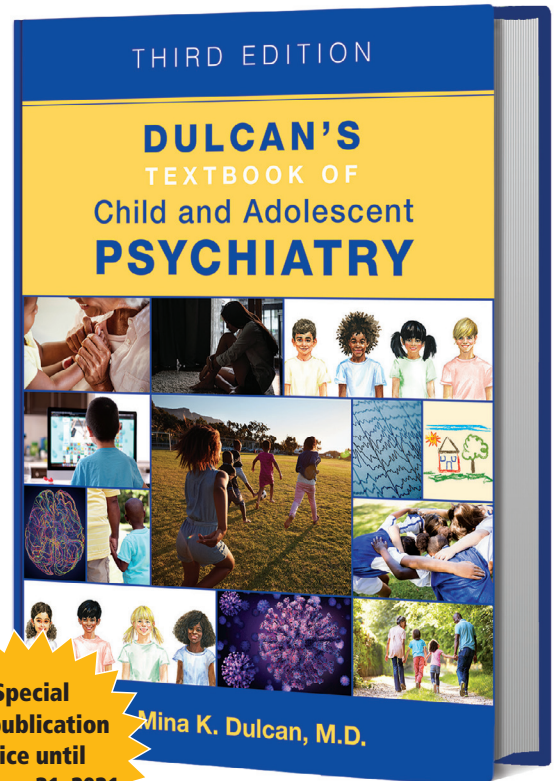

**Special  
Prepublication  
Price until  
October 31, 2021**

Mina K. Dulcan, M.D.

2022 • 1,525 pages • ISBN 978-1-61537-327-7 • Hardcover • Special Prepublication Price of \$213.00 until October 31, 2021 (thereafter \$250.00) • Item #37327

2022 • 1,525 pages • ISBN 978-1-61537-399-4 • eBook • \$200.00 • Item #37399

AMERICAN  
PSYCHIATRIC  
ASSOCIATION  
PUBLISHING

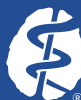

ORDER @ [www.appi.org](http://www.appi.org) | Email: [appi@psych.org](mailto:appi@psych.org) | Toll Free: 1-800-368-5777

20% Discount for American Psychiatric Association Members

25% Discount for APA Resident-Fellow Members

Follow us on

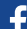

and

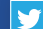

Coming March 2022!

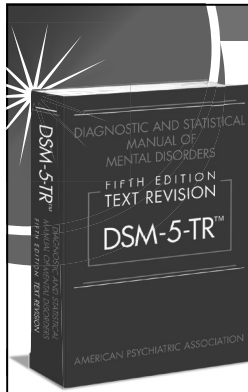

### Diagnostic and Statistical Manual of Mental Disorders, Fifth Edition, Text Revision (DSM-5-TR™)

American Psychiatric Association

The *Diagnostic and Statistical Manual of Mental Disorders*, Fifth Edition, Text Revision (DSM-5-TR), is the most comprehensive, current, and critical resource for clinical practice available to today's mental health clinicians and researchers. DSM-5-TR includes the

fully revised text and references, updated diagnostic criteria and ICD-10-CM codes since DSM-5 was published in 2013. It features a new disorder, Prolonged Grief Disorder, as well as codes for suicidal behavior available to all clinicians of any discipline without the requirement of any other diagnosis.

With contributions from over 200 subject matter experts, this updated volume boasts the most current text updates based on the scientific literature. Now in four-color and with the ability to authenticate each printed copy, DSM-5-TR provides a cohesive, updated presentation of criteria, diagnostic codes, and text.

2022 • 1,250 pages • ISBN 978-0-89042-575-6 • Hardcover • \$220.00 • Item #2575  
2022 • 1,250 pages • ISBN 978-0-89042-576-3 • Paperback • \$170.00 • Item #2576  
2022 • 1,250 pages • ISBN 978-0-89042-577-0 • eBook • \$136.00 • Item #2577

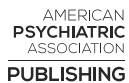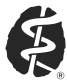

Order @ [www.appi.org](http://www.appi.org)  
Email: [appi@psych.org](mailto:appi@psych.org)  
Toll Free: 1-800-368-5777

★ 20% Discount for American Psychiatric Association Members  
25% Discount for APA Resident-Fellow Members

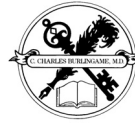

### Call for Nominations

The Institute of Living/Hartford Hospital is pleased to announce that nominations are now being accepted for the 2022 C. Charles Burlingame Award. This award, honoring an outstanding leader in psychiatric education, research or administration, is made in the memory of Dr. Burlingame, psychiatrist-in-chief from 1931 to 1950.

We invite you to nominate a person who has significantly advanced the field of psychiatry. The nomination must include a current curriculum vitae and two letters of support describing the candidate's achievements.

The Institute of Living is a comprehensive behavioral health system for the evaluation and treatment of psychiatric and addiction disorders. We offer a full continuum of services to patients and remain committed to the highest standards of clinical care, research and education.

#### Past Recipients

- |                                       |                                   |
|---------------------------------------|-----------------------------------|
| 1988 Robert Kellner, M.D., Ph.D.      | 2005 Herbert D. Kleber, M.D.      |
| 1989 William T. Carpenter, Jr., M.D.  | 2006 Daniel N. Stern, M.D.        |
| 1990 Dennis P. Cantwell, M.D.         | 2007 Jerrold F. Rosenbaum, M.D.   |
| 1991 George E. Vaillant, M.D.         | 2008 K. Ranga Rama Krishnan, M.D. |
| 1992 A. John Rush, M.D.               | 2009 David J. Kupfer, M.D.        |
| 1993 John C. Nemiah, M.D.             | 2010 Professor Sir Michael Rutter |
| 1994 Maurice J. Martin, M.D.          | 2011 Jeffrey A. Lieberman, M.D.   |
| 1995 Otto F. Kernberg, M.D.           | 2012 Judith L. Rapoport, M.D.     |
| 1996 Charles P. O'Brien, M.D., Ph.D.  | 2013 Nora D. Volkow, M.D.         |
| 1997 Glen Owen Gabbard, M.D.          | 2014 Daniel R. Weinberger, M.D.   |
| 1998 Lissy F. Jarvik, M.D., Ph.D.     | 2015 David A. Brent, M.D.         |
| 1999 Nancy C. Andreasen, M.D., Ph.D.  | 2016 Steven S. Sharfstein, M.D.   |
| 2000 Lewis L. Judd, M.D.              | 2017 Harold Alan Pincus, M.D.     |
| 2001 Paul S. Appelbaum, M.D.          | 2018 Kenneth S. Kendler, M.D.     |
| 2002 Charles B. Nemeroff, M.D., Ph.D. | 2019 Max Fink, M.D.               |
| 2003 Dilip V. Jeste, M.D.             | 2020 Ned H. Kalin, M.D.           |
| 2004 David H. Barlow, Ph.D.           | 2021 Herbert Y. Meltzer, M.D.     |

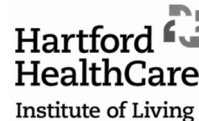

Nominations should be sent no later than March 18, 2022 to:  
Javeed Sukhera, MD, PhD  
Chair/Chief of Psychiatry  
Institute of Living/Hartford Hospital  
200 Retreat Ave., Hartford, CT 06106  
or e-mail to [Faye.Jenkins@hhchealth.org](mailto:Faye.Jenkins@hhchealth.org)

## Dive Deeper With *Psychiatric Services*' Topic Collections

Editor Lisa Dixon and the journal's Early Career Psychiatrist Advisory Committee offer **Editor's Choice** curated collections from the rich resource of articles published in *Psychiatric Services*. Updates focus on one area, summarizing for the researcher, clinician, and policy analyst the latest information and seminal research with links to specific content.

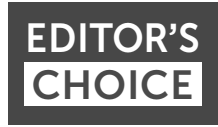

Available at the journal's website are the following article collections:

- Community-Based Mental Health Crisis Services
- Early Psychosis Intervention
- Family Members and Caregivers
- Health Disparities Among People With Serious Mental Illness
- Homelessness and Mental Health
- Integrated Care
- Mental Health Criminal Justice Diversion
- Mental Health Services in Rural Areas
- Peer Support
- Perinatal Psychiatry
- Recovery
- Psychiatric Workforce Shortage
- The Stigma of Addiction
- Racial-Ethnic Disparities in Mental Health Care
- Resilience
- Substance Use Disorders
- Suicide Prevention
- Telepsychiatry Service Implementation in the Era of COVID-19
- Violence and Mental Illness

Sign up for Editor's Choice alert at <http://appi.org/etocs>.

Visit [ps.psychiatryonline.org/editorschoice](http://ps.psychiatryonline.org/editorschoice)

AMERICAN  
PSYCHIATRIC  
ASSOCIATION  
PUBLISHING

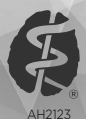

AH2123

# PSYCHIATRYonline

Your Destination for Lifelong Learning in Psychiatry

The one-stop resource for information on diagnosis, treatment, guidelines, the latest research, and breaking news from the field.

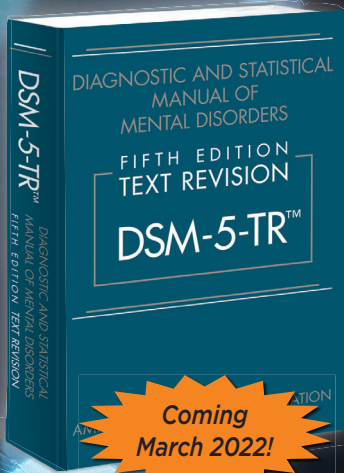

Coming  
March 2022!

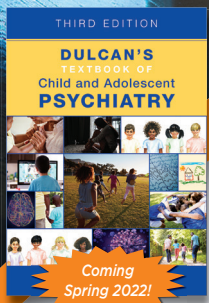

Coming  
Spring 2022!

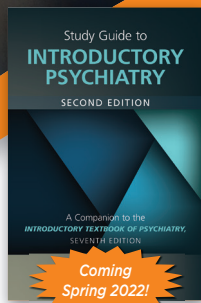

Coming  
Spring 2022!

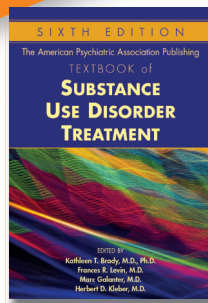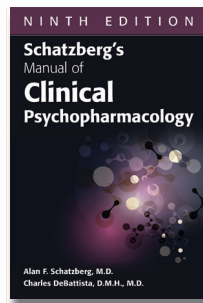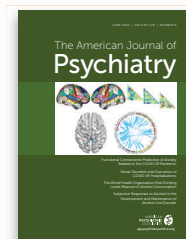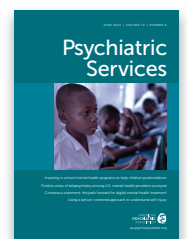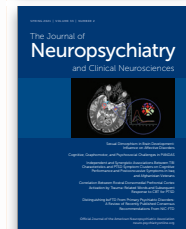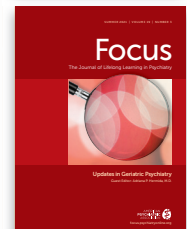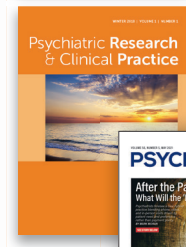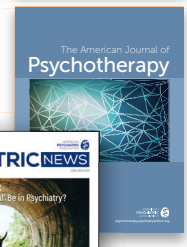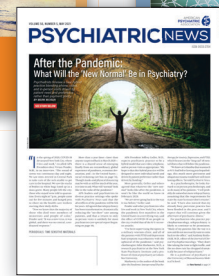

**PsychiatryOnline.org** is the platform for all American Psychiatric Association Publishing journals, DSM-5® (DSM-5-TR™ coming in March 2022), and bestselling textbooks, as well as APA Practice Guidelines, and continuing medical education.

This is a one-stop resource for information on psychiatric diagnosis, treatment, guidelines, the latest research, and breaking news from the field. From a single location, users can search across all books and journals to find the most relevant content easier than ever.

Subscribe to products individually or to the DSM Select package that includes the DSM-5® library, books and select journals.

**Go to [www.appi.org](http://www.appi.org) to subscribe.**

*Institutional subscription options are available.*

*For more information contact: [institutions@psych.org](mailto:institutions@psych.org);  
800-368-5777 ext. 3729*
